## Genetic predictors of participation in optional components of UK Biobank

Jessica Tyrrell<sup>1</sup>, Jie Zheng<sup>2</sup>, Robin Beaumont<sup>1</sup>, Kathryn Hinton<sup>1</sup>, Tom G Richardson<sup>2</sup>, Andrew R Wood<sup>1</sup>, George Davey Smith<sup>2</sup>, Timothy M Frayling<sup>1</sup>, Kate Tilling<sup>\*2</sup>

<sup>1</sup>Genetics of Complex Traits, College of Medicine and Health, University of Exeter, Exeter, UK.

<sup>2</sup> MRC Integrative Epidemiology Unit at the University of Bristol, Population Health Sciences, Bristol Medical School, University of Bristol, Bristol, BS8 2BN, UK

\* Corresponding author: Prof Kate Tilling

Email: [Kate.Tilling@bristol.ac.uk](mailto:Kate.Tilling@bristol.ac.uk)

## Abstract

Large studies (e.g. UK Biobank) are increasingly used for GWAS and Mendelian randomization (MR) studies. Selection into and dropout from studies may bias genetic and phenotypic associations. We examine genetic factors affecting participation in four optional components in up to 451,306 UK Biobank participants. We used GWAS to identify genetic variants associated with participation, MR to estimate effects of phenotypes on participation, and genetic correlations to compare participation bias across different studies. 32 variants were associated with participation in one of the optional components ( $P < 6 \times 10^{-9}$ ), including loci with known links to intelligence and Alzheimer's disease. Genetic correlations demonstrated that participation bias was common across studies. MR showed that longer educational duration, older menarche and taller stature increased participation, whilst higher levels of adiposity, dyslipidaemia, neuroticism, Alzheimer's and schizophrenia reduced participation. Our effect estimates can be used for sensitivity analysis to account for selective participation biases in genetic or non-genetic analyses.

## Introduction

Initial participation and continued engagement in cohort studies may be influenced by an individual's social and lifestyle characteristics <sup>1</sup>. This selection has the potential to result in bias in estimating phenotypic and genotypic associations <sup>2</sup>. It is well established that large cohort studies tend to have a “healthy volunteer” bias in initial participation <sup>3</sup>. There is also a growing body of evidence suggesting that continued engagement in cohort studies may be influenced by a range of factors. Studies have demonstrated age, education, ancestry, geographic location and health status are associated with loss-to-follow-up <sup>4</sup>. However, as with all observational studies, these associations may be confounded and therefore not causal in nature.

In order to assess causes of non-participation, genetic data on a more complete sample can be leveraged. Analysis of genetic data in the Avon Longitudinal Study of Parents and Children (ALSPAC) demonstrated a number of factors were causally related to participation. Education, agreeableness and openness caused higher participation, whilst higher BMI, schizophrenia, neuroticism and depression caused lower participation <sup>1,5</sup>. A study in the UK Biobank<sup>6</sup> performed a genome-wide association study of completing the mental health questionnaire, identifying 25 loci associated with survey completion, and strong positive genetic correlations with educational attainment and better health and negative genetic correlations with psychological distress and schizophrenia.

In general, an analysis will give biased estimates if the exposure and the outcome variable (or causes of them) are associated with participation (conditional on the other variables in the analysis model<sup>7</sup>). Selection bias can also occur under other

circumstances when only the outcome is related to selection, for example if exposure does cause the outcome, and the outcome causes selection<sup>7</sup>. Thus, to understand the impact of selective participation for a particular analysis, we need to identify factors that influence participation. The UK Biobank has several measures of participation. Here, we utilise up to 451,036 individuals of European ancestry in the UK Biobank to identify factors that cause participation in four optional components of the baseline study in order to improve our understanding of the biases that may affect these associations and lead to false inferences. We used 2-sample Mendelian randomisation (MR) approaches to explore the role of over 80 predictors on participation in the UK Biobank. Finally, we also explored genetic correlations between participation in the UK Biobank and the ALSPAC study to test between study consistency.

## Results

### *Observational associations*

The demographics of the participants included within this study are summarised (Table 1). Overall, 42,429 participants (Figure 1a) completed all four optional components of the UK Biobank study, whilst 51,141 participated in the food frequency questionnaire, the physical activity actigraph monitoring and the mental health questionnaire (Figure 1b).

Participation in additional UK Biobank questionnaires and tests was associated with older age (FFQ and aide memoire), female sex (all four outcomes), lower body mass index (all four outcomes), lower levels of deprivation (all four outcomes), higher fluid intelligence (all four outcomes), never smoking (all four outcomes), higher self-reported physical activity using the International Physical Activity Questionnaire (IPAQ) (FFQ and physical activity), higher measured physical activity (aide memoire, MHQ), no depression (MHQ and aide memoire) and no type 2 diabetes (all four outcomes). There was some evidence that the aide memoire variable captured a different aspect of participation, with associations in the opposite direction to the other participation measures. For example, longer duration in education was associated with lower odds of completing the aide memoire, but higher odds of participating in the other three components. This was further evidenced by strong observational associations and genetic correlations between three of the participation variables, whilst completing the aide memoire was not as robustly correlated with participation in the other optional surveys (Supplementary tables 1 and 2).

The demographics of those invited to participate in at least one the optional surveys (i.e. FFQ, MHQ and physical activity) versus not invited is summarised in Supplementary table 3. Receiving an invite to participate in the three optional surveys (n=336,633) was associated with younger age, male sex, lower body mass index, lower levels of deprivation, higher fluid intelligence, never smoking and a lower prevalence of type 2 diabetes.

### ***Genome wide association scans of the four participation variables identified 32 associated loci***

GWAS of the four participation traits was performed in individuals of European descent using BOLT-LMM, with sample sizes of N=300,639 for the FFQ, N=215,127 for physical activity monitoring, N=294,787 for MHQ and N=451,306 for aide memoire. After clumping and using a stringent GWAS cut off of  $P < 6 \times 10^{-9}$  there were 8 loci for the FFQ, 1 locus for physical activity participation, 21 loci for MHQ participation and 2 loci for aide memoire (Table 2, Supplementary figure 1). Twenty-three variants were associated at  $P < 6 \times 10^{-9}$  with receiving an invite to participate in any of the optional surveys (Supplementary table 4). All variants reaching the less stringent  $P < 5 \times 10^{-8}$  threshold are reported (Supplementary tables 4 and 5).

#### ***FFQ participation***

Two of the variants identified for FFQ participation were previously identified in GWAS of intelligence (rs11210871<sup>8,9</sup>) and cognitive performance rs13428598<sup>10</sup>). For both variants, the allele associated with higher intelligence or cognitive performance

is associated with completing more FFQ. A further two variants (rs9261655 and rs147412694) were associated with blood cell traits<sup>11</sup>. Here, the alleles associated with higher blood cell counts were associated with completing fewer FFQ. Four of the eight variants were also in high LD ( $r^2 > 0.8$ ) with genome wide significant signals from behavioural GWAS including ADHD, risk tolerance, smoking and alcohol consumption, with alleles associated with higher risk of ADHD, higher risk tolerance and higher risk of smoking or consuming alcohol associated with lower FFQ participation (Table 2).

### *Physical activity participation*

The locus identified for participation in actigraphy (rs55714359) was in partial linkage disequilibrium with the variants identified for participation in the mental health questionnaire ( $r^2 = 0.52$ ) and completing the food frequency questionnaire ( $r^2 = 0.32$ ). This variant was previously identified as associated with multiple sclerosis<sup>12</sup>, with the allele associated with higher odds of multiple sclerosis associated with lower odds of participation in physical activity. In the UK Biobank this variant is also associated with adiposity related traits<sup>13</sup>. The allele associated with higher adiposity is also associated with lower odds of participation in physical activity monitoring.

### *MHQ participation*

Of the 25 loci identified in a GWAS of MHQ participation by Adams et al we replicated 15/25 (60%) at  $P < 6 \times 10^{-9}$  and 22/25 (88%) at  $P < 5 \times 10^{-8}$  in this larger sample of related individuals. The 3 missing variants (rs35028061, rs13082026 and rs57692580) were directionally consistent and approaching genome wide significance ( $P$  values were  $5.1 \times 10^{-8}$ ,  $6.6 \times 10^{-7}$  and  $9.6 \times 10^{-7}$  respectively). Of the 21

variants associated with MHQ participation at the stringent threshold, 4 were previously associated with cognitive function and intelligence measures (rs7542974, rs485929, rs11793831 and rs7108020<sup>10</sup>) and a further 3 were in high LD with variants identified associated with intelligence outcomes. For all variants, the allele associated with higher intelligence or cognitive performance was associated with higher odds of completing the MHQ.

A missense mutation in *APOE* (rs429358) was associated with MHQ participation. The C-allele is a marker of the APOE-ε4 genotype which is a major risk factor for Alzheimer's disease<sup>14</sup>, and here, was associated with lower odds of participation in the MHQ. Further analysis in the unrelated subset tested whether individuals with APOE-ε4ε4 haplotype were less likely to participate in the MHQ compared to those with the APOE-ε2ε2 haplotype. Lower odds of MHQ participation was observed in the APOE-ε4ε4 haplotype carriers 0.89 (95%CI: 0.80, 1.00) in all individuals and in those who were less than 50 years old at recruitment (OR: 0.81 (95%CI: 0.65, 1.00)).

#### *Aide memoire*

The variant rs58101275 has previously been associated with bone mineral density<sup>15</sup> and isoleucine levels<sup>16</sup>. The allele that raises both isoleucine levels and bone mineral density (G) was associated with lower odds of completing the aide memoire.

#### *Invitation*

Of the 23 variants at  $P < 6 \times 10^{-9}$ , 6 were either top signals for MHQ participation or in high LD ( $r^2 > 0.8$ ) with variants for MHQ participation (Supplementary table 3). For all



six loci the allele that was associated with higher odds of participation in the mental health questionnaire was associated with higher odds of receiving an invite to participate in at least one optional survey. Variant rs73078357 was previously identified as associated with email contact (Supplementary table 3). 8/23 variants were previously associated with cognitive performance<sup>10</sup>, intelligence<sup>9</sup> and self-reported educational attainment<sup>10,17</sup>.

### ***Genetic correlations between the participation measures and published GWAS studies***

After Bonferroni correction ( $P < 1.5 \times 10^{-5}$ ), we observed strong positive genetic correlations between three of the four participation measures (FFQ, MHQ and physical activity completion) and qualifications, fluid intelligence, years spent in education. Strong inverse genetic correlations were noted between three of the four participation measures (FFQ completion, MHQ and physical activity completion) and obesity related traits. Completing the aide memoire, was strongly inversely correlated with risk taking, ever smoking, driving fast, having fractured bones in the last five years and schizophrenia. It was positively associated with suffering from nerves and experiencing nervous feelings.

### ***Genetic correlations between the participation measures in UK Biobank and participation measures in ALSPAC***

There were positive genetic correlations between the ALSPAC participation measures and FFQ completion (mother:  $r_g = 0.533$ ,  $P = 3 \times 10^{-8}$ ; child:  $r_g = 0.488$ ,  $P = 3 \times 10^{-9}$ ), participation in MHQ (mother:  $r_g = 0.616$ ,  $P = 8 \times 10^{-10}$ , child:  $r_g = 0.627$ ,  $P = 2 \times 10^{-12}$ ), and physical activity participation (mother  $r_g = 0.487$ ,  $P = 2 \times 10^{-5}$ ; child

$rg=0.319$ ,  $P=0.001$ ) (Figure 2). The aide memoire variable in UK Biobank was not strongly correlated with the ALSPAC participation measures (mother  $rg=0.215$ ,  $P=0.08$ , child  $rg=0.167$ ,  $P=0.14$ ). Receiving an invite to participate was strongly correlated with the participation measures in ALSPAC (mother  $rg=0.58$ ,  $P=1 \times 10^{-9}$ ; child  $rg=0.59$ ,  $P=1 \times 10^{-10}$ ).

### ***Mendelian randomization analyses***

In all individuals, genetic analysis demonstrated that 27 traits caused at least one participation measure at a threshold of  $P < 0.05$  (8 at more stringent  $P < 0.0001$ ; Supplementary table 6). Of the 27 traits, 15, 18, 10 and 6 were associated with FFQ, MHQ and physical activity and aide memoire respectively.

Longer duration in education and higher intelligence was predicted to cause higher odds of participation in the FFQ, MHQ and physical activity monitoring (Figure 3a and Supplementary table 6). For example, a one SD longer duration (~5 years) in education caused higher odds of participation in the MHQ (1.78 [95%CI: 1.61, 1.98]) and physical activity monitoring (1.69 [95%CI: 1.36, 2.13]). In contrast, there was limited evidence for longer educational duration predicting the completion of the aide memoire.

Higher adiposity caused lower odds of participation in the FFQ, MHQ and physical activity monitoring. For example, the odds ratios for participation in the MHQ and PA monitoring per one SD higher waist:hip ratio were 0.85 [95%CI: 0.80, 0.89] and 0.83 [95%CI: 0.75, 0.93] respectively (Figure 3b and supplementary table 6). Higher BMI caused lower odds of participation in the FFQ and physical activity monitoring in

women only when the 72 BMI variants were considered (Supplementary table 6).

There was limited evidence that higher adiposity predicted aide memoire completion.

A one SD taller stature caused higher odds of completing the MHQ (OR: 1.06 [95%CI: 1.04, 1.07]) and physical activity monitoring (OR: 1.07 [95%CI: 1.03, 1.11]).

Taller stature also caused participants to complete more FFQ (Figure 3b and Supplementary table 6). There was no strong evidence that any of the other anthropometric measures tested caused participation, although many of the estimates have wide confidence intervals.

Genetic evidence demonstrated that behavioural characteristics caused participation (Figure 3c). For example, older age of losing virginity caused participants to complete more FFQ and have higher odds of participation in the MHQ (OR: 1.15 [95%CI: 1.03, 1.28]). A two-fold higher genetic liability for being a morning person chronotype caused higher odds of completing the aide memoire (OR: 1.02 [95%CI: 1.01, 1.04]) and lower odds of completing the MHQ (OR: 0.98 [95%CI: 0.96, 1.00]). A two-fold higher genetic liability for riskier behaviour caused lower odds of completing the aide memoire (OR: 0.27 [95%CI: 0.19, 0.40]), but was not linked to completing the optional surveys. In a subset of former and current smokers the role of smoking heaviness on participation was explored. A one-SD higher cigarette per day (~11 cigarettes) caused lower odds of participating in the MHQ (OR: 0.88 [95%CI: 0.85, 0.92]) and the physical activity monitoring (OR: 0.93 [95%CI: 0.89, 0.97]) (Supplementary table 7).

C-reactive protein (CRP) was the only one of the biomarkers tested with some evidence of a causal association, with a two-fold higher CRP causing higher odds of

completing the MHQ (OR: 1.08 [95%CI: 1.04, 1.12]; Supplementary table 6). Higher genetic liability of cancer and non-cancer diseases and poorer metabolic health generally caused lower odds of participation (Supplementary table 6). For example, a two-fold higher genetic liability of breast cancer was associated with lower odds of participating in the MHQ (OR: 0.98 [95%CI: 0.96, 1.00]), physical activity monitoring (OR: 0.97 [95%CI: 0.95, 1.00]) and completing the aide memoire (OR: 0.97 [95%CI: 0.95, 1.00]). Several psychological and neurological conditions caused lower odds of participation (Figure 3d and Supplementary table 7). For example, a genetic liability to ADHD and schizophrenia was associated with the completion of fewer FFQ and lower odds of participation in the MHQ and physical activity monitoring. A two-fold higher genetic risk of schizophrenia lowered the odds of completing the MHQ by 3%, (OR: 0.97 [95%CI: 0.95, 0.99]). A genetic liability for schizophrenia also lowered the odds of completing the aide memoire. Genetic liability for autism and extraversion caused fewer FFQ to be completed. Alzheimer's disease genetic liability was associated with lower odds of participation in the FFQ, physical activity monitoring and MHQ. A doubling in Alzheimer's genetic liability was associated with a 0.976 [95%CI: 0.969, 0.983] lower odds of completing the MHQ.

There was little evidence that reproductive traits in women caused participation, with the exception of age at menarche. Older age at menarche in women caused higher odds of participation in the optional components of the UK Biobank (Supplementary table 6).

Generally, results were consistent when analysed in men and women separately (Supplementary table 6), with the exception of BMI and physical activity participation,

where evidence suggested high BMI only caused lower odds of participation in women ( $OR_{\text{women}}: 0.88$  [95%CI: 0.81, 0.96],  $OR_{\text{men}}: 1.01$  [95%CI: 0.92, 1.12]),  $P_{\text{interaction}}=0.07$ ).

2-sample MR methods that are more robust to pleiotropy generally provided similar results (Supplementary table 6).

## Discussion

This study explored the genetic basis of four different participation measures, plus whether or not participants were invited to at least one optional element in the UK Biobank study and used Mendelian randomization to test the causal role of a broad range of factors in participation.

Some individual characteristics appear to decrease likelihood of participation in all of the optional components of the UK Biobank study (i.e. physical activity monitoring, food frequency and MHQ). These include: lower intelligence and educational attainment; higher adiposity, and increased liability to ADHD, neuroticism and schizophrenia. Many of these were previously identified in the ALSPAC study <sup>1,5</sup>, previous UK Biobank study analyses <sup>18</sup> and Generation Scotland <sup>18</sup>. This implies that missingness of all the variables collected in the optional components of UK Biobank will be influenced by these underlying traits.

GWAS identified a number of loci robustly associated with the different participation measures. A number of genome-wide significant loci were shared across the participation traits, suggesting a general role in influencing participation (rs1565440, rs2844472, rs35917376, rs3746187). Many of the variants identified were in or near loci which had previously been identified as associating with, intelligence and cognitive function or behaviour-based traits. Alleles associated with higher intelligence or risk aversion were consistently associated with completing the MHQ and more of the FFQ. In the MHQ GWAS the top signal was in the highly pleiotropic *APOE* locus. The allele that raises participation in the MHQ (T) is associated with lower odds of Alzheimer's disease<sup>14</sup>, heart disease, inflammation and

dyslipidaemia<sup>19</sup>. Further analyses indicated that the APOE-ε4ε4 haplotype carriers were less likely to participate in the MHQ and a high genetic liability for Alzheimer's disease lowered odds of participation in the FFQ, physical activity monitoring and the MHQ.

In addition to performing GWAS of our four participation measures we also performed a GWAS of invitation to participate in at least one of the three optional components. Because only those invited can participate, the fact that not everyone is invited could result in collider bias<sup>20</sup>. A factor that is positively associated with both being invited and participation is likely to have its association with participation biased towards the null when conditioning on having been invited, assuming that being invited and participating are positively correlated (as demonstrated here) and that there are no interactions (on the probability scale) between the variable and others that also influence invitation/participation. Here, we demonstrated that some variants were associated with higher odds of both being invited to participate and completing the MHQ. This suggests that here conditioning on being invited to participate could have resulted in the Mendelian randomisation analyses for these variables being biased towards the null, rather than inducing spurious associations. However, if there are non-linearities or interactions in the effects of the risk factors on invitation/participation, then the direction of the bias cannot be predicted.

Using genetic correlation analyses we have demonstrated that these participation issues are not specific to the UK Biobank. Two participation measures from the ALSPAC study<sup>1</sup> were strongly correlated with the participation measures derived in the UK Biobank. This fits with a previous study where strong genetic correlations

were noted between UK Biobank mental health participation and participation in follow up in Generation Scotland <sup>6</sup>. These results suggest that similar genetic factors are driving participation in follow-up and optional components of studies. Similarity of factors affecting participation across different studies is potentially important for comparisons of results between studies – if similar factors cause participation in different studies, then collider bias will have the same impact on the results from each study. Thus, results from different studies would be subject to similar biases.

These results are important for informing analysis strategies and the likely direction and magnitude of bias due to conditioning only on those who participate. For the participator-only analysis for a given model to be unbiased, it is necessary for the outcome variable to be independent of missingness, given the variables in the analysis model <sup>7</sup>. Thus when examining the factors affecting physical activity, all the factors that we have shown here to be related to participation in the physical activity monitoring (BMI, height, education, intelligence, ADHD, age at menarche, should be either included in the analysis model or used in other strategies such as inverse probability weighting (IPW) or multiple imputation (MI). Where selection is related to the underlying concept(s) measured by the optional component, then this concept will be missing not at random and analyses where it is the outcome will likely be biased <sup>7</sup>. On the other hand, a participator-only analysis of a model that involves only characteristics that are unrelated to participation will not be biased by conditioning on participation.

A key advantage to the genetic analyses presented here over the observational analyses usually reported (and reported here in Table 1) is the ability to draw



conclusions about causality (under the usual assumptions of MR, in particular the assumptions around horizontal pleiotropy). For example, smoking is related to participation in the aide memoire observationally (Table 1), but may be due to confounding as there is little evidence of an association using genetic variants associated with smoking (Table S8). This information about causality may be useful to inform strategies to improve participation – for example, if smoking caused participation then qualitative work could be done to find out why smokers were less prone to participate, and then to address this in recruitment/retention strategies. However, if actually the association between smoking and participation is driven by (for example) socioeconomic position, and had nothing to do with their actual smoking, then targeting only smokers could be counter-productive. A strategy based only on improving participation in smokers could even induce more bias, in that an interaction between socioeconomic position and smoking in their effect on participation might be induced.

There are a number of limitations to this analysis. First, our analysis sample was based on Europeans only in the UK Biobank sample. The UK Biobank is not population representative and therefore these findings may not be generalisable to other population studies. Second, email access was only available at baseline and therefore this might not accurately reflect access to email at the release of the various optional components. Third, it is possible that some participants died before being able to participate in some of the optional components, however this number will likely be small. Fourth, factors relating to participation may change with age. However, we saw strong genetic correlations with our UK Biobank participation measures and the ALSPAC measures. Finally, for MR we assume that the genetic

variants used as an instrumental variable affect the outcome only through their effect on the exposure (i.e. the absence of horizontal pleiotropy). Our sensitivity analyses using MR Egger and Median MR, which are more robust to horizontal pleiotropy were generally consistent, although often had much wider confidence intervals that crossed the null.

In summary, we demonstrate that genetic variants are associated with participation in several aspects of the UK Biobank study and that a wide range of traits cause differences in participation. This builds on previous work in the ALSPAC study and here we demonstrate strong genetic correlations between the UK Biobank participation measures and ALSPAC highlighting that these issues are likely to be seen in many studies. Our findings highlight the potential for introducing bias into both genetic and non-genetic analyses. All studies need to consider the importance of selection bias, and use sensitivity analyses to assess robustness of their conclusions.

## Methods

### UK Biobank

The UK Biobank study recruited over 500,000 individuals aged between 37 and 73 years (with >99.5% aged between 40 and 70 years) from across the UK between 2006 and 2010. The UK Biobank has previously been extensively described elsewhere <sup>21,22</sup>. We used up to 451,036 UK Biobank individuals in these analyses.

### Participation measures

Four participation phenotypes were derived in the UK Biobank:

1) Percentage of food frequency questionnaires (FFQ) completed, based on the number of invites (data field 110002, 0-4) and the number of acceptances (data field 110001, 0-4). A binary variable was also created that represented sent a food frequency questionnaire but never accepted (0) and sent a food frequency questionnaire and completed at least one (1). This variable is based on the online requests which were sent out every 3-4 months a total of four times between February 2011 and June 2012 to participants who provided an email address at recruitment <sup>23</sup>.

2) Participation in physical activity monitoring, a binary variable defined using data fields 110005 and 110006. 0 represents invited but not accepted and 1 represents invited and accepted. Between February 2013 and December 2015, a random sample of participants with a valid email were invited to wear the accelerometer. Participants from the North West region were excluded due to participant burden concerns <sup>24</sup>.

3) Participation in mental health questionnaire (MHQ), a binary variable defined using data fields 20400 and 20005. 0 represents invited but not accepted and 1 represents invited and accepted. Participants with a valid email were invited to complete the MHQ. The UK Biobank's contact approach was to a) send an initial invitation email, b) send a reminder email to non-responders (2 weeks after the initial invite), c) send a reminder to partial responders (2 weeks after they started the questionnaire) and d) a last chance invitation after 4 months.

4) Aide memoire completed, a binary variable derived from data field 111 which represents compliance to a request from the UK Biobank prior to attending the assessment centre to fill out specific information to help with the questionnaire. 0 represents non-compliance and 1 represents compliance.

With the exception of the aide memoire, which was requested from everyone, the remaining variables relied on UK Biobank participants being invited to take part. The general UK Biobank protocol was to invite everyone to participate in the optional questionnaires and surveys, although as detailed above these invitations were generally sent via email. To investigate the impact of this strategy we also created a variable to represent whether participants were invited to participate in at least one of the optional surveys above (coded as 1) or not (coded as 0).

## **Genotypes**

We used imputed genotypes available from the UK Biobank for association analyses<sup>25</sup>. Variants were excluded if imputation quality (INFO) was <0.3 or the minor allele frequency (MAF) was <0.1%. This quality control process resulted in 6,930,712 variants for association analyses. Lead SNPs were defined as those with

the smallest  $P$ -value and locus boundaries were defined using a  $\pm 0.5\text{Mb}$  distance from the lead SNP.

## **Statistical analyses**

### ***Observational associations***

Logistic regression analyses were used to explore the relationship between participant demographics and the four participation measures, plus the invitation measure. The Pearson correlations and overlap between the four participation measures were also investigated. Chi-squared analyses were used to explore the overlap of the binary participation measures.

### ***Genome-wide association analysis***

All individual variant association testing was performed using BOLT-LMM<sup>26</sup> v2.3. This software applies a linear mixed model (LMM) to adjust for population structure and individual relatedness. From the ~805,000 directly-genotyped (non-imputed) variants available, we identified 524,307 “good-quality” variants (bi-allelic SNPs;  $\text{MAF} \geq 1\%$ ;  $\text{HWE } P > 1 \times 10^{-6}$ ; non-missing in all genotype batches, total missingness  $< 1.5\%$  and not in a region of long-range LD) which BOLT-LMM used to build its relatedness model. A number of covariates (age, sex, UK Biobank assessment centre and genotyping platform (categorical; UKBiLEVE array, UKB Axiom array interim release and UKB Axiom array full release) were included at runtime. Here in the main manuscript we only report variants that reached a stringent  $P < 6 \times 10^{-9}$  cut off based on simulations<sup>27</sup>. The results from the GWAS of receiving an invite to at least one of the three optional surveys is also reported.

## **Genetic correlations**

We used a method based on LD score regression<sup>28</sup> as implemented in the LD Hub software<sup>29</sup>, available at <http://ldsc.broadinstitute.org/ldhub/>, to quantify the genetic overlap between the four participation traits and 832 traits with publicly available GWA data. This method uses the cross-products of summary test statistics from two GWASs and regresses them against a measure of how much variation each SNP tags (its LD score). Variants with high LD scores are more likely to contain more true signals and thus provide a greater chance of overlap with genuine signals between GWASs. Correlations were reported if they reached a Bonferroni corrected p-value (number of tests=3220;  $P < 1.5 \times 10^{-5}$ ).

We also used the LD score regression to explore the genetic correlation between our participation measures and those available in the ALSPAC study<sup>1</sup>. The LD score regression method used summary statistics from the GWAS meta-analysis of the 4 participation measures in UK Biobank and the participation measures of ALSPAC mother and children, calculates the cross-product of test statistics at each SNP, and then regresses the cross-product on the LD score.

Finally, we utilised LD score regression to explore the genetic correlation between not receiving an invite to participate in the various optional components and the 4 participation measures.

Genome wide genetic correlations do not provide evidence of causality, which we tested with Mendelian randomisation using specific sets of variants. Instead they likely represent a complex mixture of direct and indirect causal associations in both

directions, pleiotropy and residual stratification. These likely properties of genome wide genetic correlations mean they provide a way of projecting a phenotype measured in one study into another to test between study consistency (e.g. the ALSPAC versus UK Biobank comparison), or, when comparing different traits within one study, potentially a measure of correlation that is more representative of biological processes than observational correlations, although we note that observational correlations were usually very similar to genetic correlations.

### ***Mendelian randomisation***

We undertook 2-sample MR analyses to further test the causal relationships between 80 exposure traits (decided a priori on the grounds that they are common exposures and used in current MR pipelines) (Supplementary table 8) and the four different participation outcomes. The predictors were classified into 9 broad categories (Supplementary table 8).

The 2-sample MR analyses used summary level data from the BOLT-LMM GWAS of the participation traits. Known SNPs for each exposure trait (Supplementary table 8) were extracted from the GWAS results to estimate the association of outcome and exposure-trait-SNP, whilst published coefficients from the primary GWAS were utilised for the association of exposure with exposure-trait-SNP. Four 2-sample MR methods were performed using a custom pipeline: Inverse-variance weighting (IVW); MR-Egger<sup>30</sup>; Weighted median (WM)<sup>31</sup>; Penalised weighted median (PWM)<sup>31</sup>. We have presented the IVW approach as our main analysis method, with the MR-Egger, WM and PWM representing sensitivity analyses to account for unidentified pleiotropy, which may bias our results. Horizontal pleiotropy occurs when the genetic

variants related to the exposure of interest independently influence the outcome. IVW assumes there is either no horizontal pleiotropy under a fixed effects model or, if using a random effects model after detecting heterogeneity amongst the causal estimates, that the strength of the association between the genetic instruments and the exposure is not correlated with the magnitude of the pleiotropic effects (the InSIDE assumption) and that the pleiotropic effects have an average value of zero. MR-Egger estimates and adjusts for non-zero mean pleiotropy and therefore provides unbiased estimates if just the InSIDE assumption holds<sup>30</sup>.

To explore the role of smoking heaviness on participation in the different smoking strata we performed one-sample MR in the unrelated subset of Europeans in the UK Biobank. We performed analyses in all individuals and stratified by smoking status into never, former, current and ever smokers. Here, for our binary participation measures, we first assessed the association between the cigarettes per day and the smoking GRS. The predicted values and residuals from this regression model were saved. Second, the predicted values from stage 1 were used as the independent variable and the participation measures as the dependent variable in a logistic regression model. As the FFQ participation measure was continuous we utilised the `ivreg2` command in Stata.

All analyses were performed in Stata version 14 or R version 3.5.0.



## References

- 1 Taylor, A. E. *et al.* Exploring the association of genetic factors with participation in the Avon Longitudinal Study of Parents and Children. *Int J Epidemiol* **47**, 1207-1216, doi:10.1093/ije/dyy060 (2018).
- 2 Munafo, M. R., Tilling, K., Taylor, A. E., Evans, D. M. & Davey Smith, G. Collider scope: when selection bias can substantially influence observed associations. *Int J Epidemiol* **47**, 226-235, doi:10.1093/ije/dyx206 (2018).
- 3 Fry, A. *et al.* Comparison of Sociodemographic and Health-Related Characteristics of UK Biobank Participants With Those of the General Population. *Am J Epidemiol* **186**, 1026-1034, doi:10.1093/aje/kwx246 (2017).
- 4 Lamers, F. *et al.* Sociodemographic and psychiatric determinants of attrition in the Netherlands Study of Depression and Anxiety (NESDA). *Compr Psychiatry* **53**, 63-70, doi:10.1016/j.comppsy.2011.01.011 (2012).
- 5 Martin, J. *et al.* Association of Genetic Risk for Schizophrenia With Nonparticipation Over Time in a Population-Based Cohort Study. *Am J Epidemiol* **183**, 1149-1158, doi:10.1093/aje/kww009 (2016).

- 6 Adams, M. *et al.* Factors associated with sharing email information and mental health survey participation in two large population cohorts. *bioRxiv*, 471433, doi:10.1101/471433 (2018).
  
- 7 Hughes, R. A., Heron, J., Sterne, J. A. C. & Tilling, K. Accounting for missing data in statistical analyses: multiple imputation is not always the answer. *Int J Epidemiol*, doi:10.1093/ije/dyz032 (2019).
  
- 8 Hill, W. D. *et al.* A combined analysis of genetically correlated traits identifies 187 loci and a role for neurogenesis and myelination in intelligence. *Mol Psychiatry* **24**, 169-181, doi:10.1038/s41380-017-0001-5 (2019).
  
- 9 Savage, J. E. *et al.* Genome-wide association meta-analysis in 269,867 individuals identifies new genetic and functional links to intelligence. *Nat Genet* **50**, 912-919, doi:10.1038/s41588-018-0152-6 (2018).
  
- 10 Lee, J. J. *et al.* Gene discovery and polygenic prediction from a genome-wide association study of educational attainment in 1.1 million individuals. *Nat Genet* **50**, 1112-1121, doi:10.1038/s41588-018-0147-3 (2018).

- 11 Astle, W. J. *et al.* The Allelic Landscape of Human Blood Cell Trait Variation and Links to Common Complex Disease. *Cell* **167**, 1415-1429 e1419, doi:10.1016/j.cell.2016.10.042 (2016).
- 12 International Multiple Sclerosis Genetics, C. *et al.* Analysis of immune-related loci identifies 48 new susceptibility variants for multiple sclerosis. *Nat Genet* **45**, 1353-1360, doi:10.1038/ng.2770 (2013).
- 13 Neale, B. M. *UK Biobank GWAS*, <<http://www.nealelab.is/uk-biobank/>> (2018).
- 14 Poirier, J. *et al.* Apolipoprotein E polymorphism and Alzheimer's disease. *Lancet* **342**, 697-699, doi:10.1016/0140-6736(93)91705-q (1993).
- 15 Morris, J. A. *et al.* An atlas of genetic influences on osteoporosis in humans and mice. *Nat Genet* **51**, 258-266, doi:10.1038/s41588-018-0302-x (2019).
- 16 Lotta, L. A. *et al.* Genetic Predisposition to an Impaired Metabolism of the Branched-Chain Amino Acids and Risk of Type 2 Diabetes: A Mendelian Randomisation Analysis. *PLoS Med* **13**, e1002179, doi:10.1371/journal.pmed.1002179 (2016).

- 17 Okbay, A. *et al.* Genome-wide association study identifies 74 loci associated with educational attainment. *Nature* **533**, 539-542, doi:10.1038/nature17671 (2016).
- 18 Adams, M. J. *et al.* Factors associated with sharing e-mail information and mental health survey participation in large population cohorts. *Int J Epidemiol*, doi:10.1093/ije/dyz134 (2019).
- 19 Prins, B. P. *et al.* Genome-wide analysis of health-related biomarkers in the UK Household Longitudinal Study reveals novel associations. *Sci Rep* **7**, 11008, doi:10.1038/s41598-017-10812-1 (2017).
- 20 Dudbridge, F. *et al.* Adjustment for index event bias in genome-wide association studies of subsequent events. *Nat Commun* **10**, 1561, doi:10.1038/s41467-019-09381-w (2019).
- 21 Collins, R. What makes UK Biobank special? *Lancet* **379**, 1173-1174, doi:10.1016/S0140-6736(12)60404-8 (2012).
- 22 Sudlow, C. *et al.* UK biobank: an open access resource for identifying the causes of a wide range of complex diseases of middle and old age. *PLoS Med* **12**, e1001779, doi:10.1371/journal.pmed.1001779 (2015).

- 23 Bradbury, K. E., Young, H. J., Guo, W. & Key, T. J. Dietary assessment in UK Biobank: an evaluation of the performance of the touchscreen dietary questionnaire. *J Nutr Sci* **7**, e6, doi:10.1017/jns.2017.66 (2018).
- 24 Doherty, A. *et al.* Large Scale Population Assessment of Physical Activity Using Wrist Worn Accelerometers: The UK Biobank Study. *PLoS One* **12**, e0169649, doi:10.1371/journal.pone.0169649 (2017).
- 25 Bycroft, C. *et al.* The UK Biobank resource with deep phenotyping and genomic data. *Nature* **562**, 203-209, doi:10.1038/s41586-018-0579-z (2018).
- 26 Loh, P. R. *et al.* Efficient Bayesian mixed-model analysis increases association power in large cohorts. *Nat Genet* **47**, 284-290, doi:10.1038/ng.3190 (2015).
- 27 Jones, S. E. *et al.* Genome-wide association analyses of chronotype in 697,828 individuals provides insights into circadian rhythms. *Nat Commun* **10**, 343, doi:10.1038/s41467-018-08259-7 (2019).
- 28 Bulik-Sullivan, B. *et al.* An atlas of genetic correlations across human diseases and traits. *Nat Genet* **47**, 1236-1241, doi:10.1038/ng.3406 (2015).

- 29 Zheng, J. *et al.* LD Hub: a centralized database and web interface to perform LD score regression that maximizes the potential of summary level GWAS data for SNP heritability and genetic correlation analysis. *Bioinformatics* **33**, 272-279, doi:10.1093/bioinformatics/btw613 (2017).
- 30 Bowden, J., Davey Smith, G. & Burgess, S. Mendelian randomization with invalid instruments: effect estimation and bias detection through Egger regression. *Int J Epidemiol* **44**, 512-525, doi:10.1093/ije/dyv080 (2015).
- 31 Bowden, J., Davey Smith, G., Haycock, P. C. & Burgess, S. Consistent Estimation in Mendelian Randomization with Some Invalid Instruments Using a Weighted Median Estimator. *Genet Epidemiol* **40**, 304-314, doi:10.1002/gepi.21965 (2016).

## Figure legends

**Figure 1:** Venn diagrams showing the overlap in participation within a) all four optional components and b) the mental health questionnaire, physical activity monitoring and the food frequency questionnaire. In these diagrams food frequency participation was presented as ever versus never.

**Figure 2:** Heat maps showing the genetic correlations between the UK Biobank participation measures and a) education attainment and intelligence and b) obesity related traits.

**Figure 3:** Heat maps showing the genetic correlations between the UK Biobank participation measures and two measures of participation in ALSPAC.

**Figure 3:** Dot plots representing the inverse variance weighted results from 2-sample MR analyses for a) educational, b) anthropometric, c) behavioural and d) neurological and psychological traits.

## Acknowledgements

This research has been conducted using the UK Biobank resource under application number 9072.

The authors would like to acknowledge the use of the University of Exeter High-Performance Computing (HPC) facility in carrying out this work.

## Funding statement

K.H. was funded by the Diabetes Research and Wellness Foundation (as part of fellowship to J.T.). JT is supported by an Academy of Medical Sciences (AMS) Springboard award, which is supported by the AMS, the Wellcome Trust, GCRF, the

Government Department of Business, Energy and Industrial strategy, the British Heart Foundation and Diabetes UK [SBF004\1079].

### **Author contributions**

J.T., G.D-S., T.M.F and K.T. contributed to the design of the study; J.T, J.Z., R.B., K.H., T.G.R., A.R.W., G.D-S., T.M.F. and K.T. acquired, analysed and/or interpreted the data; J.T. G.D-S., T.M.F and K.T. drafted and/or made important contributions to the article and G.D-S. and T.M.F either provided technical or supervisory support for this work.



**Table 1: Demographics of the four participation measures**

| Demographic                                | Data available on number of food frequency questionnaires completed |                                                                       |                      |
|--------------------------------------------|---------------------------------------------------------------------|-----------------------------------------------------------------------|----------------------|
|                                            | Summary demographics for those with food frequency data             | Odds (95%CI) of participation in FFQ per unit change in demographic** | P*                   |
| N                                          | 300,639                                                             |                                                                       |                      |
| Mean age at baseline (SD)                  | 56.5 (8.0)                                                          | 1.06 (1.06, 1.07)                                                     | $<1 \times 10^{-15}$ |
| Male sex, N (%)                            | 139,941 (46.6)                                                      | 0.87 (0.85, 0.88)                                                     | $<1 \times 10^{-15}$ |
| Mean BMI at baseline (SD)                  | 27.2 (4.7)                                                          | 0.83 (0.83, 0.84)                                                     | $<1 \times 10^{-15}$ |
| Mean Townsend deprivation index (SD)       | -1.73 (2.8)                                                         | 0.99 (0.98, 1.00)                                                     | 0.006                |
| Mean years in education (SD)***            | 15.8 (4.7)                                                          | 1.06 (1.06, 1.07)                                                     | $<1 \times 10^{-15}$ |
| Mean systolic blood pressure (SD)          | 143 (23)                                                            | 0.96 (0.95, 0.97)                                                     | $<1 \times 10^{-15}$ |
| Mean fluid intelligence (SD)               | 6.1 (2.1)                                                           | 1.19 (1.18, 1.20)                                                     | $<1 \times 10^{-15}$ |
| Mean self reported physical activity       | 7.4 (1.1)                                                           | 0.98 (0.98, 0.99)                                                     | $5 \times 10^{-6}$   |
| Mean physical activity (accelerometer)**** | 0.21 (0.07)                                                         | 0.97 (0.96, 0.98)                                                     | $8 \times 10^{-8}$   |
| Smoking status, N (%)                      |                                                                     |                                                                       |                      |
| Never                                      | 165,312 (55.0)                                                      | Reference                                                             | $<1 \times 10^{-15}$ |
| Former                                     | 108,888 (36.2)                                                      | 0.94 (0.92, 0.95)                                                     |                      |
| Current                                    | 22,862 (7.6)                                                        | 0.68 (0.67, 0.70)                                                     |                      |
| Type 2 diabetes, N (%)                     | 12,730 (4.2)                                                        | 0.83 (0.80, 0.86)                                                     | $<1 \times 10^{-15}$ |
| Depression, N (%)                          | 36,423 (12.1)                                                       | 1.00 (0.98, 1.02)                                                     | 0.96                 |

| Demographic                                | Participated in the physical activity monitoring |               |                                                                                              |                      |
|--------------------------------------------|--------------------------------------------------|---------------|----------------------------------------------------------------------------------------------|----------------------|
|                                            | Yes                                              | No            | Odds (95%CI) of participating in physical activity monitoring per unit change in demographic | P*                   |
| N                                          | 96,035                                           | 119,092       |                                                                                              |                      |
| Mean age at baseline (SD)                  | 56.7 (7.8)                                       | 56.7 (8.0)    | 1.00 (0.99, 1.01)                                                                            | 0.59                 |
| Male sex, N (%)                            | 42,226 (44.0)                                    | 56,273 (47.3) | 0.88 (0.86, 0.89)                                                                            | <1x10 <sup>-15</sup> |
| Mean BMI at baseline (SD)                  | 26.7 (4.5)                                       | 27.4 (4.7)    | 0.86 (0.85, 0.87)                                                                            | <1x10 <sup>-15</sup> |
| Mean Townsend deprivation index (SD)       | -1.80 (2.8)                                      | -1.75 (2.8)   | 0.98 (0.97, 0.99)                                                                            | 5x10 <sup>-5</sup>   |
| Mean years in education (SD)***            | 16.2 (4.6)                                       | 15.4 (4.9)    | 1.04 (1.03, 1.04)                                                                            | <1x10 <sup>-15</sup> |
| Mean systolic blood pressure (SD)          | 142 (23)                                         | 143 (24)      | 0.92 (0.92, 0.93)                                                                            | <1x10 <sup>-15</sup> |
| Mean fluid intelligence (SD)               | 6.04 (2.11)                                      | 5.98 (2.08)   | 1.04 (1.03, 1.05)                                                                            | 1x10 <sup>-12</sup>  |
| Mean self reported physical activity       | 7.42 (1.08)                                      | 7.36 (1.13)   | 1.05 (1.04, 1.06)                                                                            | <1x10 <sup>-15</sup> |
| Mean physical activity (accelerometer)**** | 0.21 (0.07)                                      | NA            | NA                                                                                           | NA                   |
| Smoking status, N (%)                      |                                                  |               |                                                                                              |                      |
| Never                                      | 54,352 (56.6)                                    | 64,944 (54.5) | Reference                                                                                    | <1x10 <sup>-15</sup> |
| Former                                     | 34,818 (36.3)                                    | 42,781 (35.9) | 0.98 (0.97, 1.00)                                                                            |                      |
| Current                                    | 5,860 (6.1)                                      | 9,857 (8.3)   | 0.72 (0.70, 0.74)                                                                            |                      |
| Type 2 diabetes, N (%)                     | 3,260 (3.4)                                      | 5,428 (4.6)   | 0.76 (0.73, 0.80)                                                                            | <1x10 <sup>-15</sup> |
| Depression, N (%)                          | 11,791 (12.3)                                    | 13,528 (11.4) | 1.04 (1.02, 1.07)                                                                            | 0.002                |

| Demographic                                | Participated in the mental health questionnaire |               | Odds (95%CI) of participating in mental health questionnaire per unit higher demographic variable (SD) for continuous | P*                   |
|--------------------------------------------|-------------------------------------------------|---------------|-----------------------------------------------------------------------------------------------------------------------|----------------------|
|                                            | Yes                                             | No            |                                                                                                                       |                      |
| N                                          | 146,074                                         | 148,713       |                                                                                                                       |                      |
| Mean age at baseline (SD)                  | 56.6 (7.7)                                      | 56.5 (8.2)    | 1.00 (1.00, 1.01)                                                                                                     | 0.26                 |
| Male sex, N (%)                            | 63,586 (43.5)                                   | 72,063 (48.5) | 0.82 (0.81, 0.83)                                                                                                     | <1x10 <sup>-15</sup> |
| Mean BMI at baseline (SD)                  | 26.8 (4.6)                                      | 27.5 (4.7)    | 0.86 (0.85, 0.87)                                                                                                     | <1x10 <sup>-15</sup> |
| Mean Townsend deprivation index (SD)       | -1.79 (2.8)                                     | -1.70 (2.8)   | 0.97 (0.96, 0.97)                                                                                                     | <1x10 <sup>-15</sup> |
| Mean years in education (SD)***            | 16.4 (4.5)                                      | 15.3 (4.9)    | 1.06 (1.05, 1.06)                                                                                                     | <1x10 <sup>-15</sup> |
| Mean systolic blood pressure (SD)          | 141 (23)                                        | 143 (24)      | 0.91 (0.90, 0.91)                                                                                                     | <1x10 <sup>-15</sup> |
| Mean fluid intelligence (SD)               | 6.1 (2.1)                                       | 6.0 (2.1)     | 1.10 (1.09, 1.12)                                                                                                     | <1x10 <sup>-15</sup> |
| Mean self reported physical activity       | 7.4 (1.1)                                       | 7.4 (1.1)     | 0.99 (0.98, 1.00)                                                                                                     | 0.05                 |
| Mean physical activity (accelerometer)**** | 0.21 (0.07)                                     | 0.20 (0.07)   | 1.03 (1.01, 1.04)                                                                                                     | 0.0008               |
| Smoking status, N (%)                      |                                                 |               |                                                                                                                       |                      |
| Never                                      | 83,571 (57.2)                                   | 79,862 (53.7) | Reference                                                                                                             | <1x10 <sup>-15</sup> |
| Former                                     | 51,859 (35.5)                                   | 54,247 (36.5) | 0.92 (0.91, 0.94)                                                                                                     |                      |
| Current                                    | 9,062 (6.2)                                     | 9,062 (6.2)   | 0.69 (0.67, 0.71)                                                                                                     |                      |
| Type 2 diabetes, N (%)                     | 4,692 (3.2)                                     | 7,311 (4.9)   | 0.69 (0.66, 0.71)                                                                                                     | <1x10 <sup>-15</sup> |
| Depression, N (%)                          | 17,660 (12.1)                                   | 18,002 (12.1) | 0.95 (0.93, 0.98)                                                                                                     | 6x10 <sup>-5</sup>   |

| Demographic                                | Aide memoire completed |               | Odds (95%CI) of completing aide memoire per unit change in demographic | P*                   |
|--------------------------------------------|------------------------|---------------|------------------------------------------------------------------------|----------------------|
|                                            | Yes                    | No            |                                                                        |                      |
| N                                          | 361,501                | 89,535        |                                                                        |                      |
| Mean age at baseline (SD)                  | 57.6 (7.9)             | 55.9 (8.1)    | 1.24 (1.23, 1.25)                                                      | <1x10 <sup>-15</sup> |
| Male sex, N (%)                            | 162,332 (44.9)         | 43,887 (49.0) | 0.84 (0.83, 0.85)                                                      | <1x10 <sup>-15</sup> |
| Mean BMI at baseline (SD)                  | 27.4 (4.8)             | 27.6 (4.8)    | 0.95 (0.94, 0.96)                                                      | <1x10 <sup>-15</sup> |
| Mean Townsend deprivation index (SD)       | -1.55 (2.9)            | -1.17 (3.1)   | 0.90 (0.90, 0.91)                                                      | <1x10 <sup>-15</sup> |
| Mean years in education (SD)***            | 14.8 (5.1)             | 15.2 (5.1)    | 0.99 (0.99, 0.99)                                                      | <1x10 <sup>-15</sup> |
| Mean systolic blood pressure (SD)          | 145 (24.2)             | 142 (23)      | 1.07 (1.06, 1.08)                                                      | <1x10 <sup>-15</sup> |
| Mean fluid intelligence (SD)               | 5.9 (2.1)              | 5.9 (2.1)     | 1.03 (1.01, 1.04)                                                      | 3x10 <sup>-6</sup>   |
| Mean self reported physical activity       | 7.4 (1.1)              | 7.4 (1.1)     | 1.00 (0.99, 1.00)                                                      | 0.98                 |
| Mean physical activity (accelerometer)**** | 0.21 (0.07)            | 0.20 (0.07)   | 1.05 (1.03, 1.07)                                                      | 9x10 <sup>-9</sup>   |
| Smoking status, N (%)                      |                        |               |                                                                        |                      |
| Never                                      | 195,889 (54.2)         | 46,781 (52.3) | Reference                                                              | <1x10 <sup>-15</sup> |
| Former                                     | 128,821 (35.6)         | 31,082 (34.7) | 0.94 (0.93, 0.96)                                                      |                      |
| Current                                    | 32,165 (8.9)           | 10,209 (11.4) | 0.79 (0.77, 0.81)                                                      |                      |
| Type 2 diabetes, N (%)                     | 18,130 (5.0)           | 4,425 (4.9)   | 0.94 (0.91, 0.97)                                                      | 0.0003               |
| Depression, N (%)                          | 38,535 (10.7)          | 10,541 (11.8) | 0.88 (0.86, 0.90)                                                      | <1x10 <sup>-15</sup> |

\* Age and sex adjusted models

\*\* Age and sex adjusted ordinal regression models

\*\*\* Not inverse normalised so odds per unit change

\*\*\*\* Activity proportion over 40mg

**Table 2:** Variants associated with participation from genome wide association analyses in the UK Biobank ( $P < 6 \times 10^{-9}$ )

| Participation Measure | SNP        | Chromosome | Location (Bp) | A1/A2 | Frequency | OR (95%CI) or beta (SE) | P-value  | Hit within 500KB of another participation measure? | Identified in previous GWAS* | Known association signal                                                                                | GWAS hits for loci in high LD ( $r^2 > 0.8$ )                                                                                                                                                                                                                               |
|-----------------------|------------|------------|---------------|-------|-----------|-------------------------|----------|----------------------------------------------------|------------------------------|---------------------------------------------------------------------------------------------------------|-----------------------------------------------------------------------------------------------------------------------------------------------------------------------------------------------------------------------------------------------------------------------------|
| FFQ                   | rs11210871 | 1          | 44,029,353    | C/G   | 0.30      | -0.59 (0.10)            | 1.80E-09 | Yes (MHQ)                                          | NA                           | Associated with intelligence - C allele lower intelligence (PMIDs: 29326435, 29942086)                  | In LD with variants associated with ADHD (rs11210887, $r^2 = 0.86$ , PMID: 30610198), smoking initiation (rs3001723, $r^2 = 0.90$ , PMID: 30617275), risk tolerance (rs3001723, $r^2 = 0.91$ , PMID: 30643258) and schizophrenia (rs3001723, $r^2 = 0.91$ , PMID: 26198765) |
| FFQ                   | rs76473275 | 1          | 243,460,555   | T/C   | 0.85      | -0.88 (0.13)            | 3.10E-12 |                                                    | NA                           |                                                                                                         |                                                                                                                                                                                                                                                                             |
| FFQ                   | rs13428598 | 2          | 144,250,487   | C/T   | 0.61      | -0.65 (0.09)            | 1.20E-12 | Yes (MHQ)                                          | NA                           | Associated with cognitive function, intelligence and educational attainment (PMIDs: 29326435, 30038396) | In LD with variants associated with chronotype (rs28380327, $r^2 = 0.94$ , PMID: 30696823) and neuroticism (rs10048736, $r^2 = 0.94$ , PMID: 29942085)                                                                                                                      |

|     |                 |    |             |     |      |                 |          |                                       |    |                                                             |                                                                                                                                                                                                                                                                                                                                                   |
|-----|-----------------|----|-------------|-----|------|-----------------|----------|---------------------------------------|----|-------------------------------------------------------------|---------------------------------------------------------------------------------------------------------------------------------------------------------------------------------------------------------------------------------------------------------------------------------------------------------------------------------------------------|
| FFQ | rs11134465      | 5  | 167,037,934 | G/A | 0.32 | -0.60<br>(0.10) | 4.40E-10 | Yes (MHQ)                             | NA | Associated with<br>blood cell traits<br>(PMID:<br>27863252) | In LD with<br>variants<br>associated with<br>alcohol<br>consumption<br>(rs6951574,<br>r2=0.91, PMID:<br>30643251),<br>regular<br>attendance at<br>pub or social<br>club (rs6969458,<br>r2=0.92, PMID:<br>29970889),<br>smoking status<br>(rs6951574,<br>r2=0.91, PMID:<br>30595370), risk<br>taking<br>(rs2533148,<br>r2=0.86, PMID:<br>30643258) |
| FFQ | rs9261655       | 6  | 30,288,283  | G/C | 0.89 | 0.86<br>(0.15)  | 4.00E-09 |                                       | NA |                                                             |                                                                                                                                                                                                                                                                                                                                                   |
| FFQ | rs2622102       | 7  | 153,495,423 | A/G | 0.52 | 0.60<br>(0.09)  | 5.30E-11 | Yes (MHQ)                             | NA |                                                             |                                                                                                                                                                                                                                                                                                                                                   |
| FFQ | rs200373        | 19 | 18,286,546  | T/A | 0.51 | 0.52<br>(0.09)  | 4.80E-09 | Yes (physical<br>activity and<br>MHQ) | NA |                                                             |                                                                                                                                                                                                                                                                                                                                                   |
| FFQ | rs14741269<br>4 | 21 | 40,702,786  | G/A | 0.85 | -0.77<br>(0.13) | 9.60E-10 |                                       | NA | Associated with<br>blood cell traits<br>(PMID:<br>27863252) | In LD with<br>variants<br>associated with<br>smoking status<br>(rs77217252,<br>r2=0.85, PMID:<br>30595370)                                                                                                                                                                                                                                        |

|                   |            |    |             |     |      |                         |          |                      |                                                            |                                                                                                                       |
|-------------------|------------|----|-------------|-----|------|-------------------------|----------|----------------------|------------------------------------------------------------|-----------------------------------------------------------------------------------------------------------------------|
| Physical activity | rs55714539 | 19 | 18,207,397  | A/C | 0.66 | 1.08<br>(1.05,<br>1.11) | 1.30E-09 | Yes (FFQ and<br>MHQ) | NA                                                         | Associated with<br>Multiple<br>sclerosis (PMID:<br>24076602)                                                          |
| MHQ               | rs7542974  | 1  | 72,544,704  | G/A | 0.75 | 0.97<br>(0.96,<br>0.98) | 1.30E-09 |                      | Yes, lead<br>SNP                                           | Associated with<br>cognitive<br>function (PMID:<br>30038396) and<br>intelligence<br>(PMID:<br>29942086)               |
| MHQ               | rs485929   | 1  | 74,678,285  | A/G | 0.61 | 0.97<br>(0.96,<br>0.98) | 4.00E-10 |                      | Yes, lead<br>SNP                                           | Associated with<br>cognitive<br>function (PMID:<br>30038396) and<br>intelligence<br>(PMID:<br>29942086)               |
| MHQ               | rs618232   | 1  | 84,357,225  | A/C | 0.26 | 1.03<br>(1.02,<br>1.04) | 1.30E-09 |                      | Yes, within<br>500kb of<br>SNP<br>rs532246<br>(r2=0.9947)  |                                                                                                                       |
| MHQ               | rs1565440  | 1  | 243,387,788 | G/A | 0.63 | 1.03<br>(1.02,<br>1.04) | 6.50E-13 | Yes (FFQ)            | Yes, within<br>500kb of<br>SNP<br>rs2789111<br>(r2=0.8612) | Associated with<br>risk taking<br>behaviour<br>(PMID:<br>30271922)                                                    |
| MHQ               | rs1012940  | 2  | 184,534,996 | A/C | 0.70 | 0.97<br>(0.96,<br>0.98) | 9.70E-10 |                      | No                                                         | In LD with a<br>variant<br>associated with<br>educational<br>attainment<br>(rs3897821,<br>r2=0.86, PMID:<br>30038396) |
| MHQ               | rs34631    | 5  | 60,526,326  | T/C | 0.52 | 0.97<br>(0.96,<br>0.98) | 1.20E-10 |                      | Yes, within<br>500kb of<br>rs34635<br>(r2=0.6629)          | In LD with<br>variants<br>associated with<br>self-reported<br>maths ability<br>(rs194369,<br>r2=0.98, PMID:           |

|     |            |    |            |     |      |                   |          |           |                                            |  |                                                                                                                                                                                                                                                                                                                                                                                                                                              |                                                                         |
|-----|------------|----|------------|-----|------|-------------------|----------|-----------|--------------------------------------------|--|----------------------------------------------------------------------------------------------------------------------------------------------------------------------------------------------------------------------------------------------------------------------------------------------------------------------------------------------------------------------------------------------------------------------------------------------|-------------------------------------------------------------------------|
|     |            |    |            |     |      |                   |          |           |                                            |  | Associated with multiple sclerosis (PMID: 24076602, rheumatoid arthritis) (PMID: 23143596), blood traits (PMID: 27863252), psoriasis (PMID: 23143594) and SLE (PMID: 26502338) Associated with cognitive performance (PMID: 30038396), intelligence (PMID: 29942086), self reported educational attainment (PMID: 27046643) and bipolar disorder (PMID: 27329760) Associated with urinary albumin - G allele higher albumin (PMID: 30220432) | 30038396) and general cognitive ability (rs34627, r2=1, PMID: 29844566) |
| MHQ | rs2844472  | 6  | 31,589,676 | A/G | 0.65 | 1.03 (1.02, 1.04) | 1.60E-09 | Yes (FFQ) | Yes, within 500kb of rs3993747 (r2=0.9636) |  | In LD with a variant associated with height (rs2857693, r2=0.89, PMID: 25282103)                                                                                                                                                                                                                                                                                                                                                             |                                                                         |
| MHQ | rs11793831 | 9  | 23,362,311 | G/T | 0.58 | 0.97 (0.96, 0.98) | 8.60E-11 |           | Yes, lead SNP                              |  |                                                                                                                                                                                                                                                                                                                                                                                                                                              |                                                                         |
| MHQ | rs2236295  | 10 | 64,564,892 | G/T | 0.60 | 1.03 (1.02, 1.04) | 5.90E-09 |           | No                                         |  | In LD with a variant associated with diastolic blood pressure                                                                                                                                                                                                                                                                                                                                                                                |                                                                         |



|     |            |    |             |     |      |                         |          |           |                                                      |                                                                                                                                                       |                                             |
|-----|------------|----|-------------|-----|------|-------------------------|----------|-----------|------------------------------------------------------|-------------------------------------------------------------------------------------------------------------------------------------------------------|---------------------------------------------|
|     |            |    |             |     |      |                         |          |           |                                                      |                                                                                                                                                       | (rs10995311,<br>r2=0.81, PMID:<br>27618447) |
| MHQ | rs7910869  | 10 | 67,964,514  | T/C | 0.79 | 0.97<br>(0.96,<br>0.98) | 7.60E-10 |           | No                                                   |                                                                                                                                                       |                                             |
| MHQ | rs1223114  | 11 | 31,523,130  | A/G | 0.39 | 1.03<br>(1.02,<br>1.04) | 1.80E-09 |           | Yes, within<br>500kb of<br>rs1984389<br>(r2=0.6852)  |                                                                                                                                                       |                                             |
| MHQ | rs17145219 | 11 | 83,167,337  | C/G | 0.89 | 1.04<br>(1.03,<br>1.06) | 2.90E-09 |           | No                                                   |                                                                                                                                                       |                                             |
| MHQ | rs7108020  | 11 | 131,289,820 | C/A | 0.36 | 0.97<br>(0.96,<br>0.98) | 8.70E-12 |           | Yes, within<br>500kb of<br>rs10791143<br>(r2=0.8252) | Associated with<br>educational<br>attainment and<br>highest math<br>class taken - A<br>associated with<br>higher<br>attainment<br>(PMID:<br>30038396) |                                             |
| MHQ | rs35917376 | 15 | 75,595,357  | T/A | 0.25 | 1.03<br>(1.02,<br>1.04) | 4.40E-09 | Yes (FFQ) | No                                                   |                                                                                                                                                       |                                             |
| MHQ | rs8055041  | 16 | 7,462,715   | C/G | 0.52 | 0.97<br>(0.97,<br>0.98) | 1.40E-09 |           | Yes, within<br>500kb of<br>rs4616299<br>(r2=0.7553)  |                                                                                                                                                       |                                             |
| MHQ | rs7207531  | 17 | 56,426,789  | G/A | 0.58 | 0.97<br>(0.96,<br>0.98) | 1.30E-09 |           | Yes, within<br>500kb of<br>rs56058331<br>(r2=1)      |                                                                                                                                                       |                                             |
| MHQ | rs1261078  | 18 | 52,866,791  | A/G | 0.95 | 1.07<br>(1.05,<br>1.09) | 5.50E-12 |           | Yes, lead<br>SNP                                     |                                                                                                                                                       |                                             |
| MHQ | rs35502362 | 19 | 4,966,041   | C/T | 0.65 | 0.97<br>(0.96,<br>0.98) | 3.20E-09 |           | Yes, within<br>500kb of<br>rs34232444<br>(r2=1)      | Associated with<br>haematological<br>traits (PMID:<br>27863252)                                                                                       |                                             |

|              |            |    |             |     |      |                         |          |                             |                  |                                                                                                                                                                                         |
|--------------|------------|----|-------------|-----|------|-------------------------|----------|-----------------------------|------------------|-----------------------------------------------------------------------------------------------------------------------------------------------------------------------------------------|
| MHQ          | rs3746187  | 19 | 18,279,816  | A/G | 0.60 | 1.03<br>(1.02,<br>1.04) | 1.80E-10 | Yes (FFQ and<br>actigraphy) | Yes, lead<br>SNP | In LD with a<br>variant<br>associated with<br>the number of<br>sexual partners<br>(rs273512,<br>r2=0.84, PMID:<br>30643258)                                                             |
| MHQ          | rs429358   | 19 | 45,411,941  | T/C | 0.85 | 1.06<br>(1.05,<br>1.07) | 1.10E-20 |                             | Yes, lead<br>SNP | Highly<br>pleiotropic<br>APOE variant -<br>associated with<br>Alzheimer's<br>disease,<br>cholesterol,<br>CRP etc.                                                                       |
| MHQ          | rs1232482  | 20 | 11,886,643  | C/T | 0.60 | 0.97<br>(0.96,<br>0.98) | 2.30E-09 |                             | No               | In LD with<br>variants<br>associated with<br>diastolic blood<br>pressure<br>(rs1232482,<br>r2=1, PMID:<br>30224653,<br>cigarettes per<br>day (rs6078373,<br>r2=0.93, PMID:<br>30643251) |
| Aide memoire | rs2049604  | 7  | 113,990,352 | C/T | 0.64 | 0.97<br>(0.96,<br>0.98) | 4.60E-09 |                             | NA               |                                                                                                                                                                                         |
| Aide memoire | rs58101275 | 14 | 104,008,420 | G/A | 0.79 | 0.96<br>(0.95,<br>0.98) | 5.00E-09 |                             | NA               | Associated with<br>heel bone<br>mineral density<br>(PMID:<br>30598549) and<br>isoleucine<br>levels (PMID:<br>27898682)                                                                  |

**Figure 1:** Venn diagrams showing the overlap in participation within A) all four optional components and B) the mental health questionnaire, physical activity monitoring and the food frequency questionnaire. In these diagrams food frequency participation was presented as ever versus never.

A

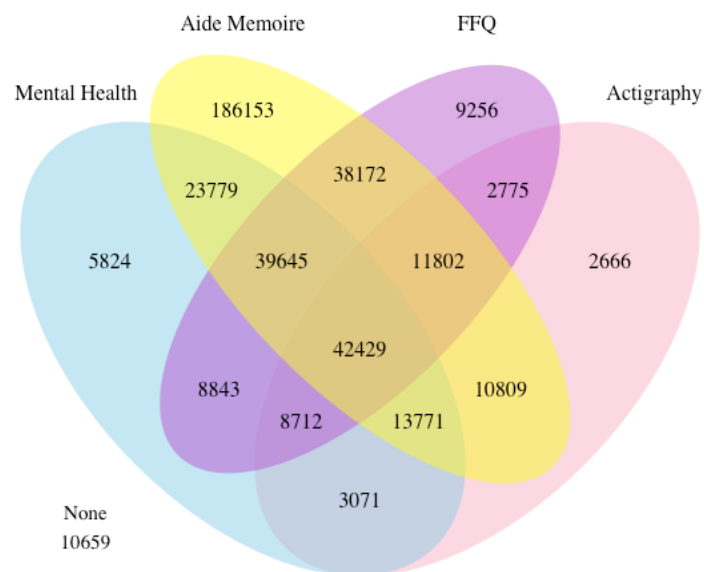

B

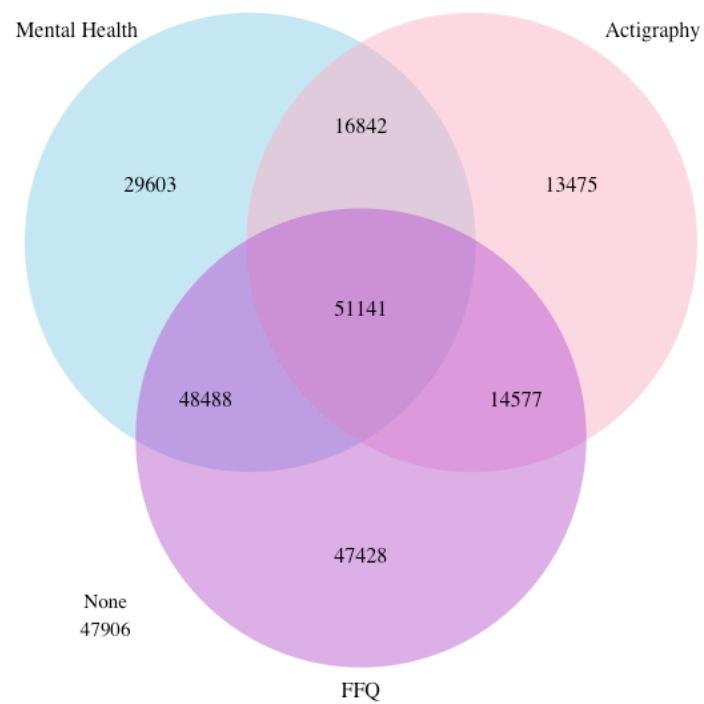

**Figure 2:** Heat maps showing the genetic correlations between the UK Biobank participation measures and two measures of participation in ALSPAC.

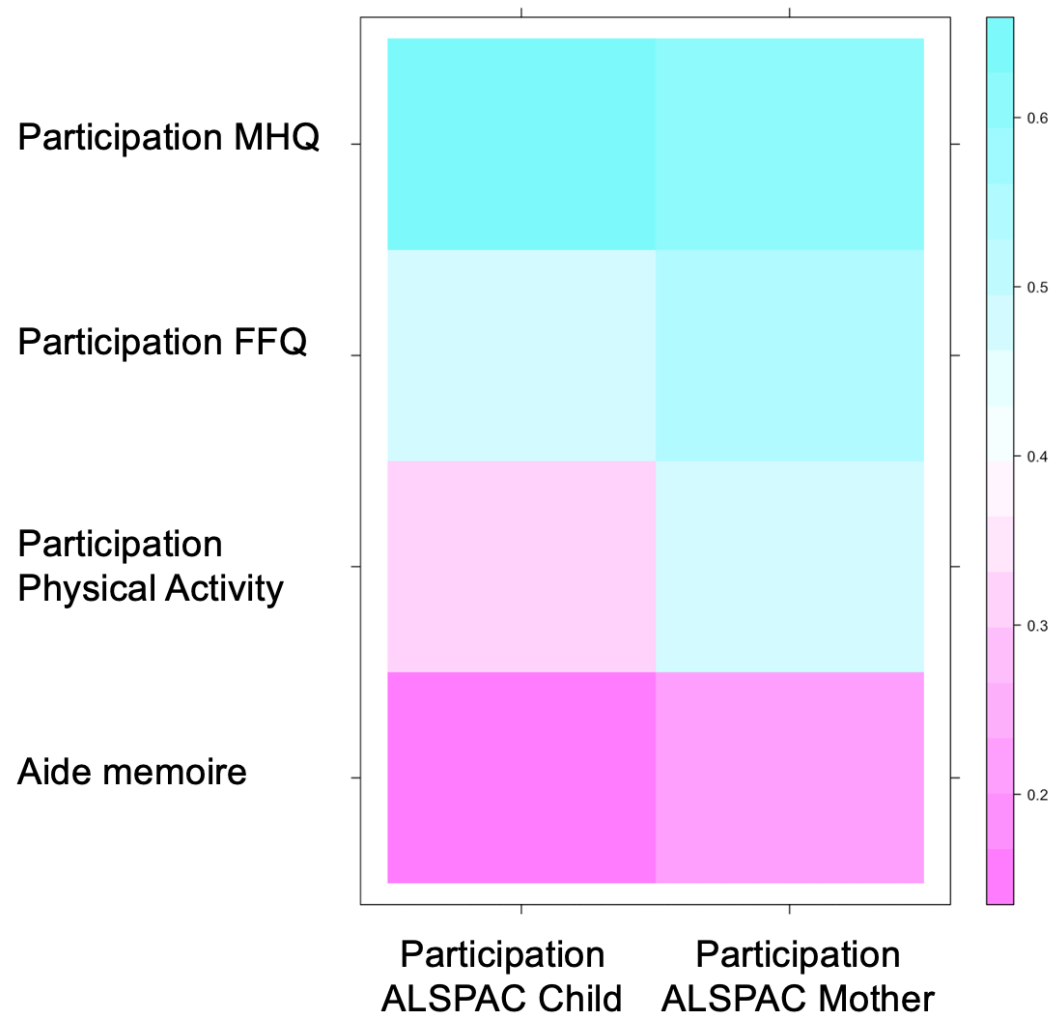

**Figure 3:** Dot plots representing the inverse variance weighted results from 2-sample MR analyses for a) educational, b) anthropometric, c) behavioural and d) neurological and psychological traits.

A)

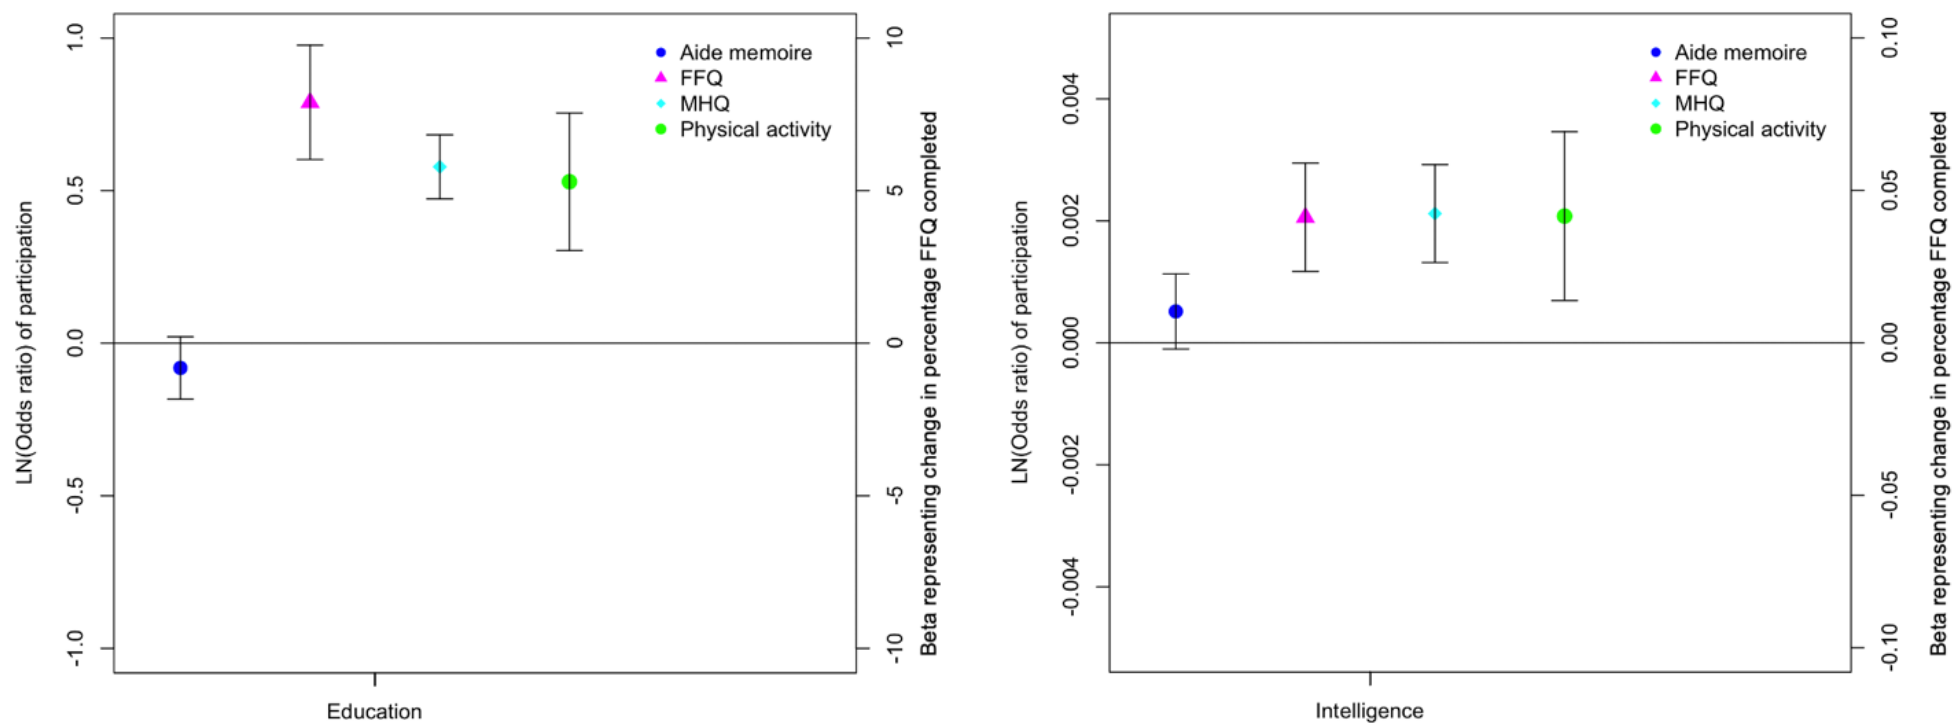

B)

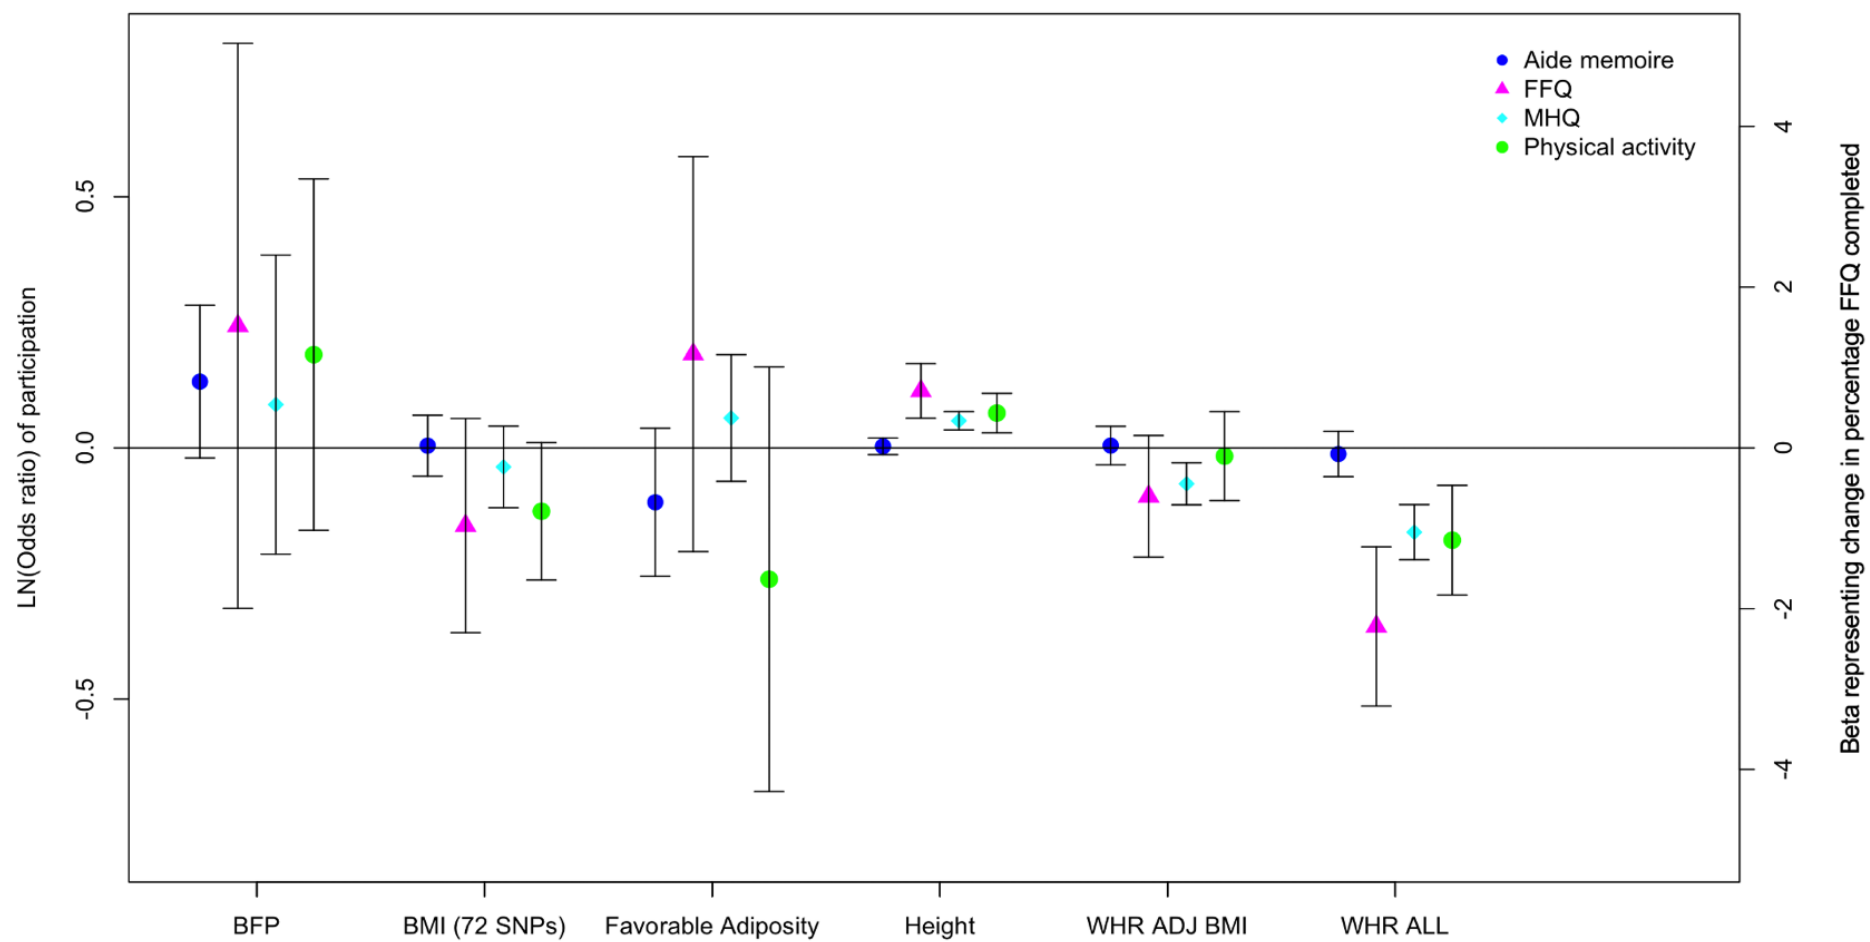

C)

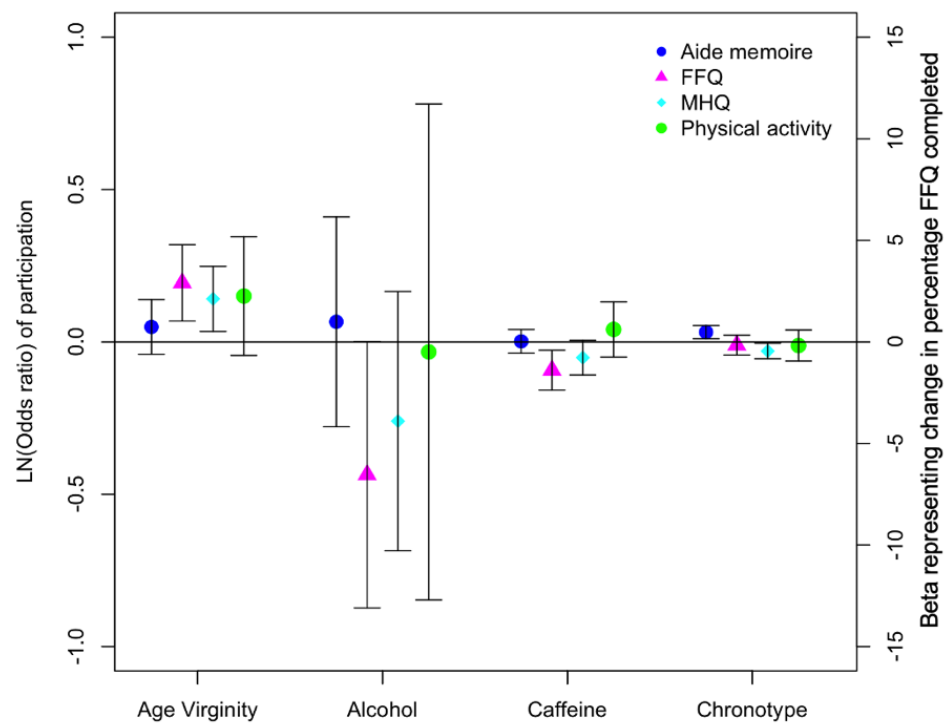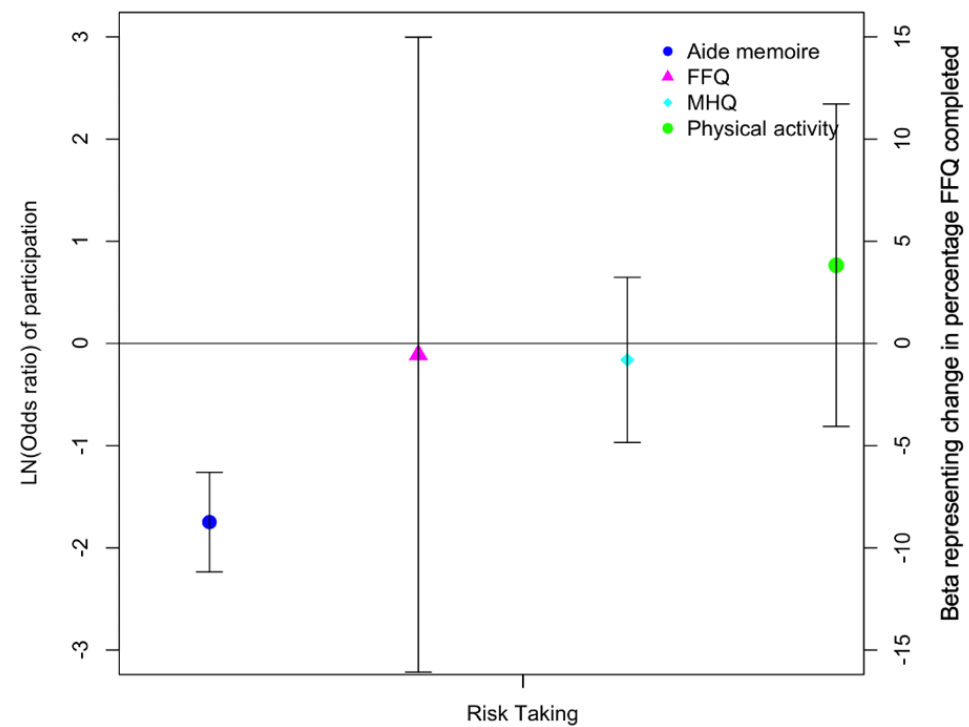

D)

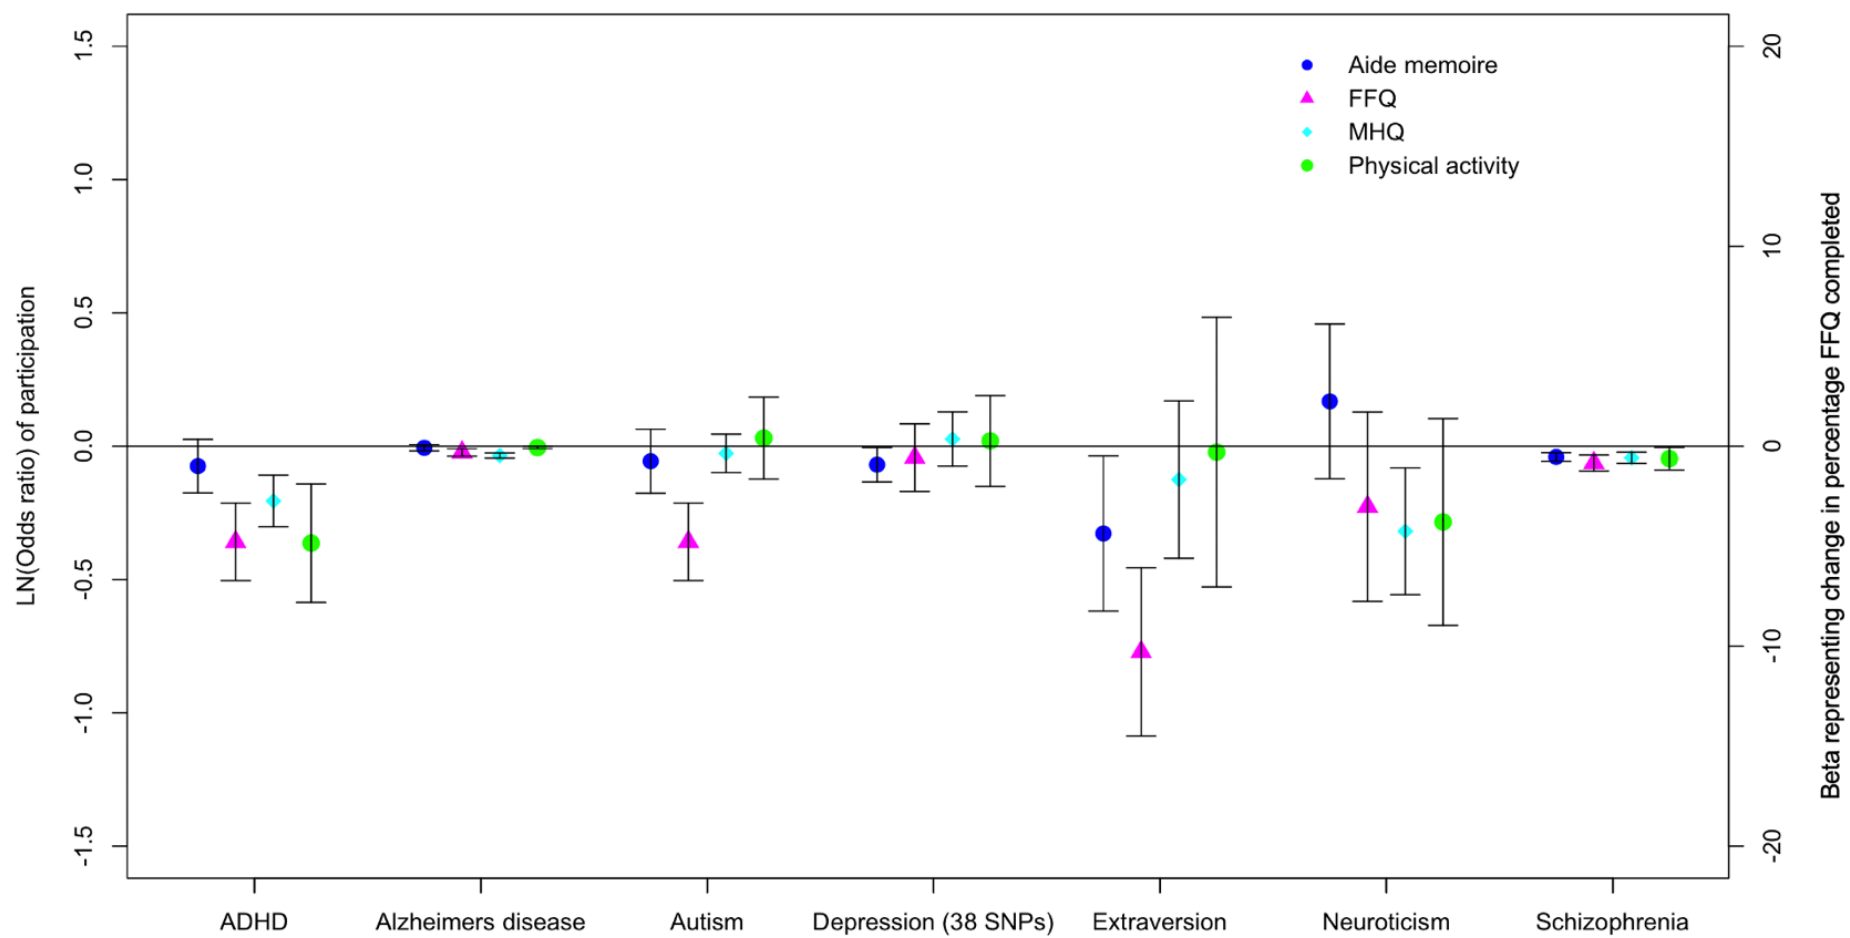

Source: https://www.biorxiv.org/content/10.1101/2020.02.10.941328v1.full.pdf
